# Supplementary material
Source: publisher figshare collection journal article supplement (https://acs.figshare.com/ndownloader/files/21718842)
Supplement: Supplementary file 1 [file 21718842]

## Sheet: EPIFANY greedy on B 0.01
alpha	beta	gamma	Objective value (pAUC on entrapment ROC)
0.01	0.01	0.01	0.975393
0.21	0.01	0.01	0.940314
0.41	0.01	0.01	0.941361
0.61	0.01	0.01	0.941361
0.81	0.01	0.01	0.942932
0.01	0.21	0.01	0.946073
0.21	0.21	0.01	0.989529
0.41	0.21	0.01	0.986911
0.61	0.21	0.01	0.988482
0.81	0.21	0.01	0.988482
0.01	0.41	0.01	0.429319
0.21	0.41	0.01	0.97644
0.41	0.41	0.01	0.987958
0.61	0.41	0.01	0.991099
0.81	0.41	0.01	0.991099
0.01	0.61	0.01	0
0.21	0.61	0.01	0.949215
0.41	0.61	0.01	0.970157
0.61	0.61	0.01	0.986387
0.81	0.61	0.01	0.986387
0.01	0.81	0.01	0
0.21	0.81	0.01	0.949215
0.41	0.81	0.01	0.949215
0.61	0.81	0.01	0.949215
0.81	0.81	0.01	0.967016
0.01	0.01	0.21	0.975393
0.21	0.01	0.21	0.937696
0.41	0.01	0.21	0.937696
0.61	0.01	0.21	0.934555
0.81	0.01	0.21	0.933508
0.01	0.21	0.21	0.946073
0.21	0.21	0.21	0.987958
0.41	0.21	0.21	0.989529
0.61	0.21	0.21	0.989005
0.81	0.21	0.21	0.988482
0.01	0.41	0.21	0.165445
0.21	0.41	0.21	0.967016
0.41	0.41	0.21	0.986387
0.61	0.41	0.21	0.989529
0.81	0.41	0.21	0.991099
0.01	0.61	0.21	0
0.21	0.61	0.21	0.949215
0.41	0.61	0.21	0.967016
0.61	0.61	0.21	0.971728
0.81	0.61	0.21	0.986387
0.01	0.81	0.21	0
0.21	0.81	0.21	0.949215
0.41	0.81	0.21	0.949215
0.61	0.81	0.21	0.949215
0.81	0.81	0.21	0.949215
0.01	0.01	0.41	0.970157
0.21	0.01	0.41	0.935602
0.41	0.01	0.41	0.93089
0.61	0.01	0.41	0.929319
0.81	0.01	0.41	0.928796
0.01	0.21	0.41	0.946073
0.21	0.21	0.41	0.984817
0.41	0.21	0.41	0.989529
0.61	0.21	0.41	0.989529
0.81	0.21	0.41	0.987435
0.01	0.41	0.41	0.429319
0.21	0.41	0.41	0.966492
0.41	0.41	0.41	0.972251
0.61	0.41	0.41	0.987958
0.81	0.41	0.41	0.991099
0.01	0.61	0.41	0
0.21	0.61	0.41	0.949215
0.41	0.61	0.41	0.949215
0.61	0.61	0.41	0.967016
0.81	0.61	0.41	0.967016
0.01	0.81	0.41	0
0.21	0.81	0.41	0.949215
0.41	0.81	0.41	0.949215
0.61	0.81	0.41	0.949215
0.81	0.81	0.41	0.949215
0.01	0.01	0.61	0.924084
0.21	0.01	0.61	0.935079
0.41	0.01	0.61	0.928796
0.61	0.01	0.61	0.926178
0.81	0.01	0.61	0.920942
0.01	0.21	0.61	0.846073
0.21	0.21	0.61	0.968586
0.41	0.21	0.61	0.987958
0.61	0.21	0.61	0.989529
0.81	0.21	0.61	0.987958
0.01	0.41	0.61	0
0.21	0.41	0.61	0.949215
0.41	0.41	0.61	0.966492
0.61	0.41	0.61	0.970157
0.81	0.41	0.61	0.976963
0.01	0.61	0.61	0
0.21	0.61	0.61	0.949215
0.41	0.61	0.61	0.949215
0.61	0.61	0.61	0.949215
0.81	0.61	0.61	0.960209
0.01	0.81	0.61	0
0.21	0.81	0.61	0.949215
0.41	0.81	0.61	0.949215
0.61	0.81	0.61	0.949215
0.81	0.81	0.61	0.949215
0.01	0.01	0.81	0.841361
0.21	0.01	0.81	0.929319
0.41	0.01	0.81	0.926702
0.61	0.01	0.81	0.92356
0.81	0.01	0.81	0.918848
0.01	0.21	0.81	0.846073
0.21	0.21	0.81	0.963351
0.41	0.21	0.81	0.968586
0.61	0.21	0.81	0.976963
0.81	0.21	0.81	0.974869
0.01	0.41	0.81	0
0.21	0.41	0.81	0.949215
0.41	0.41	0.81	0.949215
0.61	0.41	0.81	0.958639
0.81	0.41	0.81	0.958639
0.01	0.61	0.81	0
0.21	0.61	0.81	0.949215
0.41	0.61	0.81	0.949215
0.61	0.61	0.81	0.949215
0.81	0.61	0.81	0.947644
0.01	0.81	0.81	0
0.21	0.81	0.81	0.949215
0.41	0.81	0.81	0.949215
0.61	0.81	0.81	0.949215
0.81	0.81	0.81	0.949215
